# Supplementary material for: RETRACTED ARTICLE: Silencing of TRIM11 suppresses the tumorigenicity of chordoma cells through improving the activity of PHLPP1/AKT
Source: Springer Nature journal article supplement (doi:10.1186/s12935-019-1007-7), 2019-11-08
Supplement: MOESM1 [file 17367326]

# Additional file 1: Primer sequence information

# 1.1 Homo sapiens tripartite motif containing 11 (TRIM11), mRNA

NM_145214.2

Primer F 5' CGAAGACCTCAAGGCGAAGC 3'

Primer R 5' CAGCAAACGGCGAAGACG 3'

Pos: 396-567

Amplified product: Size: 172 bps

**1.2 Homo sapiens PH domain and leucine rich repeat protein phosphatase 1 (PHLPP1), mRNA**

NM_194449.4

Primer F 5' TGTGCCTGAGTGGGTATGTG 3'

Primer R 5' GTGTCCTGCCAGTAGTTTCC 3'

Pos: 2724-2847

Amplified product: Size: 124 bps

**1.3Homo sapiens glyceraldehyde-3-phosphate dehydrogenase(GAPDH),transcript variant2, mRNA**NM_001256799.2
Primer F     5' AATCCCATCACCATCTTC 3'
Primer R     5' AGGCTGTTGTCATACTTC 3'
Pos:  436-653
Amplified product:    Size: 218 bps

**Additional** **file 1: Table S1: Human gene TRIM11 (NM_145214.2) RNAi targeting locus information**

| RNAi Targeting Locus | | | Sequence |
| --- | --- | --- | --- |
| Name | locus positon | |
| SiTRIM11-1 | | 672-690 | GGAGAAGTCACTGGAGCA |
| SiTRIM11-2 | | 708-726 | GGATGCGTTGCTGTTCCAA |
| SiTRIM11-3 | | 746-764 | GCGTCTTGTGGCAGAAGAT |

**Additional file 1: Table S2: The primary antibodies information**

| Antibody name | Catalog number | Source | Dilution factor |
| --- | --- | --- | --- |
| TRIM11 | Ab111694 | Abcam, UK | 1:2000 |
| PHLPP1（SCOP） | Ab135957 | Abcam, UK | 1:500 |
| XIAP | Ab28151 | Abcam, UK | 1:1000 |
| Cleaved Caspase3 | Ab2302 | Abcam, UK | 1:500 |
| p-AKT | #9271 | CST | 1:1000 |
| AKT | #9272 | CST | 1:1000 |
| GAPDH | #5174 | CST | 1:2000 |
